# Supplementary material for: Serum 25-hydroxyvitamin D as a predictive biomarker of clinical outcomes in patients with primary membranous nephropathy
Source: PubMed Central journal article supplement (PMC10167293; doi:10.3389/fnut.2023.1171216), 2023-04-25
Supplement: Data_Sheet_1.pdf [file Data_Sheet_1.pdf]

Supplementary FIGURE 1

(A)

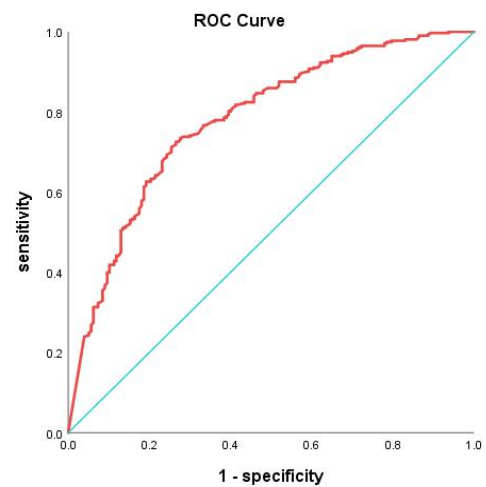

(B)

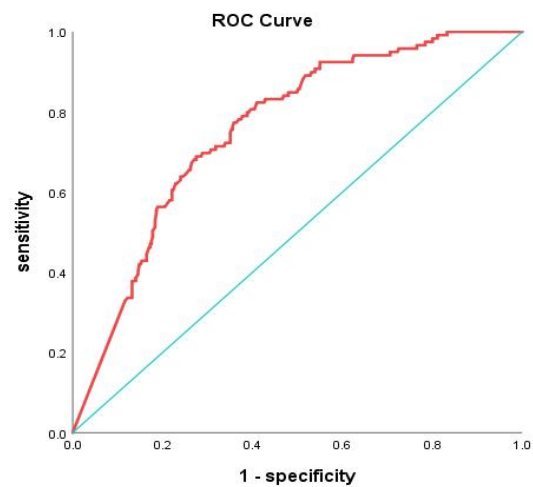

(C)

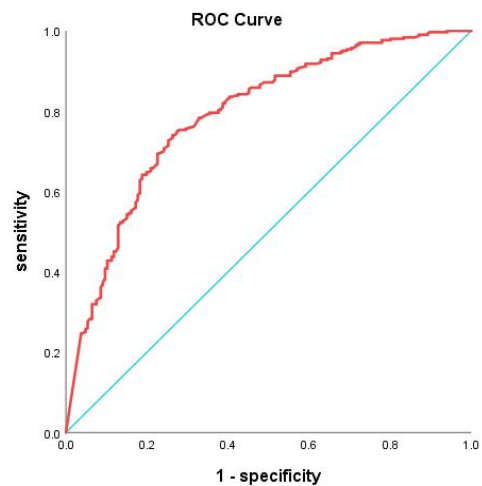

(D)

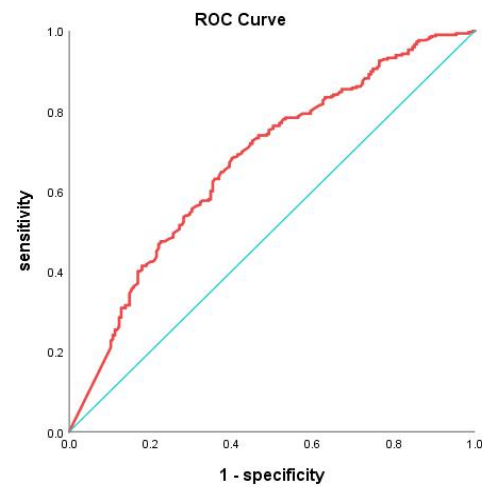

Supplementary FIGURE 2

(A)

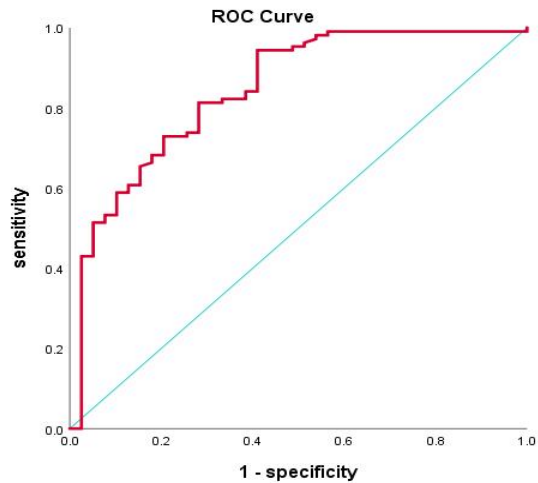

(B)

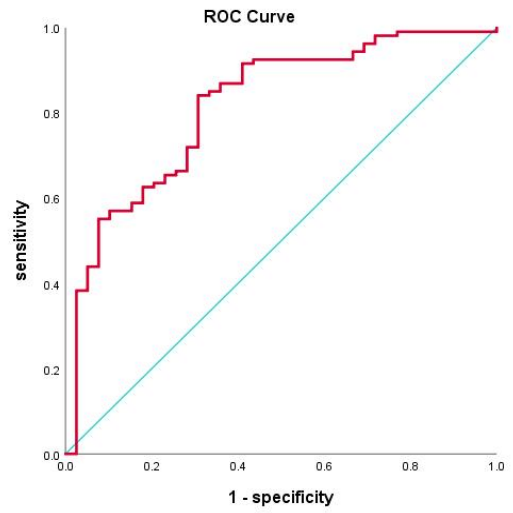

(C)

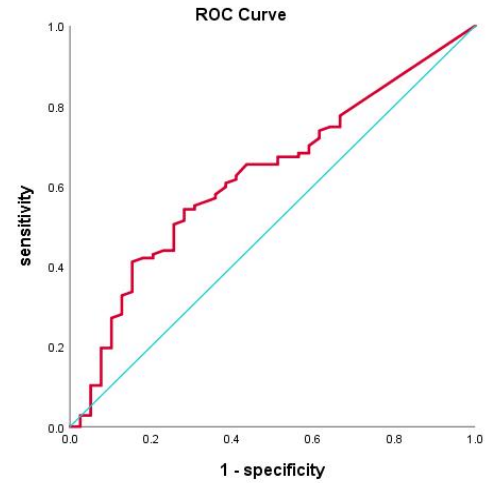

## Supplementary Figure legends

**Supplementary Figure 1. Association of baseline 25(OH)D and the levels of proteinuria in all enrolled patients.** A. Predictive performance of baseline 25(OH)D for urinary protein  $\geq 3.5$ g/d evaluated by ROC curves (AUC=0.780). B. Predictive performance of baseline 25(OH)D for urinary protein  $>8$ g/d evaluated by ROC curves (AUC=0.758). C. Predictive performances of baseline 25(OH)D for patients presenting with nephrotic syndrome evaluated by ROC curves (AUC=0.790). D. Predictive performances of baseline 25(OH)D for the seropositivity of anti-PLA2R Ab evaluated by ROC curves (AUC=0.672). 25(OH)D, 25-hydroxyvitamin D. ROC, receiver operating characteristic. AUC, the area under the ROC curve.

**Supplementary Figure 2. Prediction of 25(OH)D for treatment responses in follow-up cohort.** A. Predictive performance of follow-up 25(OH)D for remission (CR or PR) evaluated by ROC curves (AUC=0.844). B. Predictive performance of  $\Delta$  25(OH)D for remission (CR or PR) evaluated by ROC curves (AUC=0.817). C. Predictive performance of baseline 25(OH)D for remission (CR or PR) evaluated by ROC curves (AUC=0.625). 25(OH)D, 25-hydroxyvitamin D. ROC, receiver operating characteristic. AUC, the area under the ROC curve.  $\Delta$ 25(OH)D was the difference of 25(OH)D between baseline and follow-up.

Supplementary TABLE 1

Baseline serum PTH levels of patients with different levels of proteinuria.

| Parameter        | Total<br>n=339     | Urinary protein (g/d) |                    |                    | P Value |
|------------------|--------------------|-----------------------|--------------------|--------------------|---------|
|                  |                    | <3.5 (n=121)          | 3.5-8.0 (n=131)    | >8.0 (n=87)        |         |
| Serum PTH, pg/mL | 30.70(22.90,44.60) | 31.30(23.40,42.05)    | 29.40(22.80,43.20) | 31.90(18.30,48.80) | 0.690   |

PTH, parathyroid hormone.

Urinary protein:3.5-8.0g/L ( $\geq 3.5$  and  $\leq 8.0$ ).

Data were presented as the median with interquartile range. A two-tailed  $P < 0.05$  was considered statistically significant.

Supplementary TABLE 2

Baseline serum PTH levels of NS patients with different outcomes

|  | Total<br>n=102 | CR+PR<br>n=70 | NR<br>n=32 | P Value |
|--|----------------|---------------|------------|---------|
|  |                |               |            |         |

NS, nephrotic syndrome; CR, complete remission; PR, partial remission; NR, non-remission/response, PTH, parathyroid hormone.

Data were presented as the median with interquartile range. A two-tailed  $P < 0.05$  was considered statistically significant.
